# Supplementary material for: Validity and Efficacy of Methods to Define Blood Brain Barrier Integrity in Experimental Ischemic Strokes: A Comparison of Albumin Western Blot, IgG Western Blot and Albumin Immunofluorescence
Source: PubMed Central journal article supplement (PMC8005953; doi:10.3390/mps4010023), 2021-03-23
Supplement: mps-04-00023-s001.pdf [file mps-04-00023-s001.pdf]

# Validity and Efficacy of Methods to Define Blood Brain Barrier Integrity in Experimental Ischemic Strokes: A Comparison of Albumin Western Blot, IgG Western Blot and Albumin Immunofluorescence

Maximilian Franke, Michael Bieber, Guido Stoll and Michael Klaus Schuhmann \*

Department of Neurology, University Hospital Wuerzburg, Josef-Schneider-Str. 11,  
97080 Würzburg, Germany; franke\_m1@ukw.de (M.F.); bieber\_m@ukw.de (M.B.); stoll\_g@ukw.de (G.S.);

\* Correspondence: schuhmann\_m@ukw.de

Supplementary Material

**Table S1:** Detailed cost breakdown for chemicals, antibodies and consumption material of albumin WB, IgG WB and AIM.

| Name                                   | Supplier      | Order number | Pack size | Price [€]/package | Used quantity in IgG WB | Price [€] for IgG WB | quantity in albumin WB | for albumin WB | Used quantity in AIM | Price [€] for AIM |
|----------------------------------------|---------------|--------------|-----------|-------------------|-------------------------|----------------------|------------------------|----------------|----------------------|-------------------|
| <b>chemicals</b>                       |               |              |           |                   |                         |                      |                        |                |                      |                   |
| Acrylamide 30 %                        | Carl Roth     | 3029.1       | 1 l       | 64,50             | 7,5 ml                  | 0,48                 | 7,5 ml                 | 0,48           | -                    | -                 |
| Tris(hydroxymethyl)aminomethan         | Roche         | 1,0709E+10   | 1 kg      | 97,92             | 11 g                    | 1,08                 | 11 g                   | 1,08           | -                    | -                 |
| Sodium dodecyl sulfate                 | Merck         | 1137601000   | 1 kg      | 179,20            | 1,5 g                   | 0,27                 | 1,5 g                  | 0,27           | -                    | -                 |
| Tetramethylethylenediamine             | Merck         | T9281-100ML  | 0,1 l     | 33,00             | 0,04 ml                 | 0,01                 | 0,04 ml                | 0,01           | -                    | -                 |
| Ammoniumperoxodisulfate                | Merck         | A3678-100G   | 0,1 kg    | 38,36             | 0,021 g                 | 0,01                 | 0,021 g                | 0,01           | -                    | -                 |
| Glycin                                 | Merck         | G8898-1KG    | 1 kg      | 36,96             | 43,2 g                  | 1,58                 | 43,2 g                 | 1,58           | -                    | -                 |
| Sodiumchloride                         | Th.Geyer      | 13671000     | 1 kg      | 10,00             | 0,05 g                  | 0,01                 | 0,05 g                 | 0,01           | -                    | -                 |
| Tergitol-type NP-40                    | Merck         | 74385-1L     | 1 l       | 54,31             | 0,045 ml                | 0,02                 | 0,045 ml               | 0,02           | -                    | -                 |
| Protease inhibitor cOmplete®           | Roche         | 1,1697E+10   | 40 ml     | 331,00            | 0,2 ml                  | 1,65                 | 0,2 ml                 | 1,65           | -                    | -                 |
| Sertile Water                          | Local pharma  | -            | 1 l       | 3,00              | 1 l                     | 3,00                 | 1 l                    | 3,00           | 1,5 l                | 4,50              |
| Phosphatase inhibitor Phos Stop Easy   | Roche         | 4906837001   | 20 ml     | 256,00            | 0,1 ml                  | 5,12                 | 0,1 ml                 | 5,12           | -                    | -                 |
| BCA Protein Assay Kit®                 | Merck         | 71285        | 0,5 l     | 328,00            | 22 ml                   | 14,40                | 22 ml                  | 14,40          | -                    | -                 |
| Glycerin                               | Merck         | G2025-500ML  | 0,5 l     | 41,71             | 0,1 ml                  | 0,02                 | 0,1 ml                 | 0,02           | -                    | -                 |
| β-mercaptoethanol                      | Merck         | M3148-100ML  | 0,1 l     | 11,45             | 0,1 ml                  | 0,01                 | 0,1 ml                 | 0,01           | -                    | -                 |
| Bromphenol blue                        | Merck         | B8026-5G     | 5 g       | 51,30             | 0,005 g                 | 0,05                 | 0,005 g                | 0,05           | -                    | -                 |
| Methanol                               | Local pharma  | -            | 1 l       | 66,00             | 60 ml                   | 3,96                 | 60 ml                  | 3,96           | 250 ml               | 16,50             |
| Bovine serum albumin                   | Merck         | -            | 1 kg      | 2430,00           | -                       | -                    | -                      | -              | 1 g                  | 2,43              |
| Ponceau S-solution                     | Merck         | P7170        | 1 l       | 75,51             | 15 ml                   | 1,13                 | 15 ml                  | 1,13           | -                    | -                 |
| Milk powder                            | Carl Roth     | T145.2       | 0,5 kg    | 21,90             | 1,2 g                   | 0,05                 | 1,2 g                  | 0,05           | -                    | -                 |
| H2O2-solution 30%                      | Carl Roth     | CP26.1       | 1 l       | 18,50             | 15 ml                   | 0,28                 | 15 ml                  | 0,28           | -                    | -                 |
| Octylphenoxypolyethoxyethanol          | Merck         | 9002-93-1    | 0,5 l     | 63,90             | -                       | -                    | -                      | -              | 5 ml                 | 0,64              |
| Enhanced Chemiluminescence Substrate   | Perkin Elmer  | NEL 105001E  | 680 ml    | 616,00            | 12 ml                   | 10,80                | 12 ml                  | 10,80          | -                    | -                 |
| Precision Plus Protein Western C Stain | Bio-Rad       | 161-0376     | 0,25 ml   | 208,00            | 0,012 ml                | 10,05                | 0,012 ml               | 10,05          | -                    | -                 |
| Precision Protein StrepTactin HRP®     | Bio-Rad       | 161-0380     | 0,3 ml    | 162,00            | 0,003 ml                | 1,62                 | 0,003 ml               | 1,62           | -                    | -                 |
| Phosphate buffered saline 1x           | Selfmade      | -            | 1 l       | 4,91              | 100 ml                  | 0,49                 | 100 ml                 | 0,49           | 1 l                  | 4,91              |
| Polysorbat 20 (Tween-20)               | Merck         | P9416-100ML  | 0,1 l     | 33,21             | 0,75 ml                 | 0,24                 | 0,75 ml                | 0,24           | -                    | -                 |
| Pap-Pen®                               | Merck         | Z672548      | 1 pc      | 96,40             | -                       | -                    | -                      | -              | 15%                  | 14,46             |
| <b>subtotal chemicals</b>              |               |              |           |                   |                         | <b>56,33</b>         |                        | <b>56,33</b>   |                      | <b>43,44</b>      |
| <b>antibodies</b>                      |               |              |           |                   |                         |                      |                        |                |                      |                   |
| Chicken anti albumin                   | Abcam         | ab106582     | 0,1 ml    | 480,00            | -                       | -                    | 0,0075 ml              | 32,00          | -                    | -                 |
| HRP goat anti chicken                  | Abcam         | ab6877       | 0,5 ml    | 225,00            | -                       | -                    | 0,003 ml               | 1,35           | -                    | -                 |
| Mouse anti actin                       | Merck         | A5441-100UL  | 100 µl    | 395,00            | 0,00012 ml              | 0,48                 | 0,00012 ml             | 0,48           | -                    | -                 |
| HRP donkey anti-mouse IgG              | Dianova       | 715-035-150  | 0,5 ml    | 172,00            | 0,002 ml                | 1,04                 | 0,002 ml               | 1,04           | -                    | -                 |
| HRP donkey anti-mouse IgG              | Dianova       | 715-035-150  | 0,5 ml    | 172,00            | -                       | -                    | 0,01 ml                | 5,16           | -                    | -                 |
| Rabbit anti albumin                    | Abcam         | ab207327     | 0,1 ml    | 555,00            | -                       | -                    | -                      | -              | 0,005 ml             | 55,50             |
| Alexa Fluor 488 donkey anti rabbit     | BioLegend     | AF594        | 0,5 ml    | 258,00            | -                       | -                    | -                      | -              | 0,01 ml              | 10,32             |
| ProLong Gold Antifade®                 | Thermo Fisher | P36930       | 10 ml     | 254,00            | -                       | -                    | -                      | -              | 1 ml                 | 25,40             |
| <b>subtotal antibodies</b>             |               |              |           |                   |                         | <b>1,52</b>          |                        | <b>40,03</b>   |                      | <b>91,22</b>      |
| <b>consumption material</b>            |               |              |           |                   |                         |                      |                        |                |                      |                   |
| Western-Blotting-Membranes, nitro      | Merck         | GE10600002   | 1 pc      | 249,00            | 0,01 pc                 | 2,50                 | 0,01 pc                | 2,50           | -                    | -                 |
| Whatman paper                          | Hartenstein   | GB33         | 50 pcs    | 179,00            | 0,2 pc                  | 0,33                 | 0,2 pc                 | 0,33           | -                    | -                 |
| Tubes 1,5 ml                           | Hartenstein   | RSF1         | 2000 pcs  | 37,17             | 100 pcs                 | 1,59                 | 100 pcs                | 1,59           | 4 pcs                | 0,06              |
| Tubes 2,0 ml                           | Hartenstein   | RK2G         | 1000 pcs  | 20,46             | 45 pcs                  | 0,92                 | 45 pcs                 | 0,92           | 4 pcs                | 0,08              |
| Cuvettes                               | Eppendorf     | 759115       | 100 pcs   | 15,42             | 45 pcs                  | 1,68                 | 45 pcs                 | 1,68           | -                    | -                 |
| Falcon® 15 ml                          | Eppendorf     | 11507411     | 1000 pcs  | 117,00            | 5 pcs                   | 0,58                 | 5 pcs                  | 0,58           | 2 pcs                | 0,23              |
| Falcon® 50 ml                          | Eppendorf     | 10788561     | 1000 pcs  | 155,00            | 10 pcs                  | 1,55                 | 15 pcs                 | 2,33           | -                    | -                 |
| Plastic pipette                        | Hartenstein   | PSB          | 400 pcs   | 29,00             | 8 pcs                   | 0,58                 | 10 pcs                 | 0,73           | 6 pcs                | 0,04              |
| Pipette tips                           | Hartenstein   | FB15/FB10    | 3000 pcs  | 30,00             | 150 pcs                 | 1,50                 | 150 pcs                | 1,50           | 20 pcs               | 0,20              |
| Combitips advanced®                    | Hartenstein   | EC10         | 100 pcs   | 150,00            | 3 pcs                   | 4,50                 | 3 pcs                  | 4,50           | -                    | -                 |
| Microscope slides                      | Hartenstein   | OTS          | 72 pcs    | 21,90             | -                       | -                    | -                      | -              | 8 pcs                | 2,43              |
| Cover slip                             | Hartenstein   | DK50         | 100 pcs   | 5,90              | -                       | -                    | -                      | -              | 8 pcs                | 0,47              |
| <b>subtotal consumption material</b>   |               |              |           |                   |                         | <b>15,73</b>         |                        | <b>16,65</b>   |                      | <b>3,51</b>       |
| <b>total expenses</b>                  |               |              |           |                   |                         | <b>73,57</b>         |                        | <b>113,00</b>  |                      | <b>138,17</b>     |

The table lists the expenses for chemicals, antibodies and consumption material as well as the total expenses for n = 8 per method. (Carl Roth: Karlsruhe, BW, Germany; Roche: Basel, Switzerland; Merck: Darmstadt, HE, Germany; Perkin Elmer: Waltham, MA, United States of America; Bio-Rad Technologies: Hercules, CA, United States of America; Abcam: Cambridge, CAM, United Kingdom; Thermo Fisher: Waltham, MA, United States of America; Hartenstein: Würzburg, BY, Germany; Eppendorf: Hamburg, HH, Germany).
